# Supplementary material for: Targeted regulation of transcription in primary cells using CRISPRa and CRISPRi
Source: HighWire-hosted journal article supplement (doi:10.1101/gr.275607.121), 2021-08-18
Supplement: Supplemental_File_1.zip [file ITGAX_indel_analysis.xlsx]

## Sheet: CD11c indel analysis
				ICE analysis indel %			Seq file name
		ITGAX sgRNA #	sgRNA spacer sequence	Duplicate 1	Duplicate 2		Duplicate 1	Duplicate 2
		sgRNA #1	AACUGAUCCGAGGACAGGCU	85	85		1F04ZAC075	1F04ZAC076
		sgRNA #2	UCAUCUGAUGAGAGUGACUC	81	82		1F04ZAC077	1F04ZAC078
		sgRNA #3	UGGCAGUCAAGGGUGAGCCU	53	46		1F04ZAC079	1F04ZAC080
		sgRNA #4	UGGGCAGAUGCCAACCCCUC	83	80		1F04ZAC081	1F04ZAC082
		sgRNA #5	CAGAGUACGCAACUGAUCCG	93	94		1F04ZAC083	1F04ZAC084
		sgRNA #6	GGGUGCCUUCUGGCAGUCAA	88	90		1F04ZAC086	1F04ZAC197
		sgRNA #7	CCAACCCCUCAGGACCCUAA	73	74		1F04ZAC087	1F04ZAC088
		sgRNA #8	GGGGCAUCCGGGUCCCUAGG	61	51		1F04ZAC089	1F04ZAC090
		sgRNA #9	AGCAGAGGGCUUGCAUCUCC	94	94		1F04ZAC091	1F04ZAC092
		sgRNA #10	GCAAGUUCAUUGCUGUGAGG	72	66		1F04ZAC093	1F04ZAC094
		Mock control					1F04ZAC095
